# Supplementary material for: The Development of a WTC Environmental Health Center Pan-Cancer Database
Source: MDPI journal article supplement (doi:10.3390/ijerph18041646), 2021-02-09
Supplement: s1 [file s1]

Figure S1: The screenshot of the WTC EHC Pan-cancer database in REDCap.

|                                                                          |                                                                                                                                                                                                                                                               |
|--------------------------------------------------------------------------|---------------------------------------------------------------------------------------------------------------------------------------------------------------------------------------------------------------------------------------------------------------|
| <b>Record ID</b>                                                         | 2843                                                                                                                                                                                                                                                          |
| <b>Date of initial visit to WTCHEC</b>                                   | <input type="text"/> Today M-D-Y                                                                                                                                                                                                                              |
| <b>WTCHP ID#</b>                                                         | <input type="text"/>                                                                                                                                                                                                                                          |
| <b>Bellevue MRN</b>                                                      | <input type="text"/>                                                                                                                                                                                                                                          |
| <b>Elmhurst MRN</b>                                                      | <input type="text"/>                                                                                                                                                                                                                                          |
| <b>Gouverneur MRN</b>                                                    | <input type="text"/>                                                                                                                                                                                                                                          |
| <b>Last Name</b><br><small>* must provide value</small>                  | <input type="text"/>                                                                                                                                                                                                                                          |
| <b>Middle Name</b>                                                       | <input type="text"/>                                                                                                                                                                                                                                          |
| <b>First Name</b><br><small>* must provide value</small>                 | <input type="text"/>                                                                                                                                                                                                                                          |
| <b>Date of birth</b><br><small>* must provide value</small>              | <input type="text"/> Today M-D-Y                                                                                                                                                                                                                              |
| <b>SSN</b>                                                               | <input type="text"/>                                                                                                                                                                                                                                          |
| <b>Last 4 SSN</b>                                                        | <input type="text"/>                                                                                                                                                                                                                                          |
| <b>Gender</b>                                                            | <input type="radio"/> Female <input type="radio"/> Male <input type="radio"/> Other <input type="radio"/> Unknown <a href="#">reset</a>                                                                                                                       |
| <b>Race</b>                                                              | <input type="radio"/> Asian<br><input type="radio"/> Black or African American<br><input type="radio"/> Native Hawaiian/Pacific Islander<br><input type="radio"/> Unknown<br><input type="radio"/> White<br><input type="radio"/> Other <a href="#">reset</a> |
| <b>Ethnicity</b>                                                         | <input type="radio"/> Hispanic<br><input type="radio"/> Non-Hispanic<br><input type="radio"/> Unknown <a href="#">reset</a>                                                                                                                                   |
| <b>Date of death (if applicable) (clinical source)</b>                   | <input type="text"/> Today M-D-Y                                                                                                                                                                                                                              |
| <b>Date of death (if applicable) (National Death Index (NDI) source)</b> | <input type="text"/> Today M-D-Y                                                                                                                                                                                                                              |
| <b>Research consent form signed</b>                                      | <input type="radio"/> Yes <input type="radio"/> No <input type="radio"/> Pending <a href="#">reset</a>                                                                                                                                                        |

|                                                                      |                                                                                                                                                                                                                                                               |       |
|----------------------------------------------------------------------|---------------------------------------------------------------------------------------------------------------------------------------------------------------------------------------------------------------------------------------------------------------|-------|
| <b>Cancer Type (cancer 1)</b><br><small>* must provide value</small> | Other                                                                                                                                                                                                                                                         |       |
| <b>Other cancer type (cancer 1)</b>                                  |                                                                                                                                                                                                                                                               |       |
| <b>Source of data (cancer 1)</b>                                     | <input type="checkbox"/> Clinical records<br><input type="checkbox"/> New York tumor registry<br><input type="checkbox"/> Connecticut tumor registry<br><input type="checkbox"/> New Jersey tumor registry<br><input type="checkbox"/> Florida tumor registry |       |
| <b>ICD.9 Description/Code (cancer 1)</b>                             |                                                                                                                                                                                                                                                               |       |
| <b>ICD.10 Description/Code (cancer 1)</b>                            |                                                                                                                                                                                                                                                               |       |
| <b>NIOSH certified (cancer 1)</b>                                    | <input type="radio"/> Yes <input type="radio"/> No <input type="radio"/> Pending                                                                                                                                                                              | reset |
| <b>Laterality (cancer 1)</b>                                         | <input type="radio"/> Left<br><input type="radio"/> Right<br><input type="radio"/> Bilateral<br><input type="radio"/> Not applicable<br><input type="radio"/> Unknown                                                                                         | reset |
| <b>Date of diagnostic procedure (cancer 1)</b>                       | <input type="text"/> Today M-D-Y                                                                                                                                                                                                                              |       |
| <b>Age at diagnosis (cancer 1)</b>                                   | <input type="text"/> View equation                                                                                                                                                                                                                            |       |
| <b>Latency period (cancer 1) (months)</b>                            | <input type="text"/> View equation                                                                                                                                                                                                                            |       |
| <b>Place of initial pathology report (cancer 1)</b>                  |                                                                                                                                                                                                                                                               |       |
| <b>Multiplicity (# of tumors at primary site) (cancer 1)</b>         | <input type="radio"/> 1 <input type="radio"/> 2 <input type="radio"/> 3 <input type="radio"/> 4+ <input type="radio"/> Not applicable                                                                                                                         | reset |
| <b>Tumor margins (cancer 1)</b>                                      | <input type="radio"/> Positive<br><input type="radio"/> Negative<br><input type="radio"/> Close margins<br><input type="radio"/> Unknown<br><input type="radio"/> Not applicable                                                                              | reset |
| <b>Grade (cancer 1)</b>                                              |                                                                                                                                                                                                                                                               |       |
| <b>Histology (ICD-O-3) (cancer 1)</b>                                |                                                                                                                                                                                                                                                               |       |
| <b>pT-Primary Tumor (cancer 1)</b>                                   |                                                                                                                                                                                                                                                               |       |
| <b>Tumor size (cm) (cancer 1)</b>                                    |                                                                                                                                                                                                                                                               |       |
| <b>pN-Regional Lymph Nodes (cancer 1)</b>                            |                                                                                                                                                                                                                                                               |       |
| <b>pM-Distant metastasis (cancer 1)</b>                              |                                                                                                                                                                                                                                                               |       |
| <b>Stage (cancer 1)</b>                                              |                                                                                                                                                                                                                                                               |       |

|                                                                                                                                                                                  |                                                                                                                                                                                                                                                                                             |
|----------------------------------------------------------------------------------------------------------------------------------------------------------------------------------|---------------------------------------------------------------------------------------------------------------------------------------------------------------------------------------------------------------------------------------------------------------------------------------------|
| <b>Biomarker (1) name (cancer 1)</b>                                                                                                                                             | <br> <input type="text"/>                                                                                                 |
| <b>Biomarker (1) date (cancer 1)</b>                                                                                                                                             | <br> <input type="text"/>  Today M-D-Y |
| <b>Biomarker (1) specimen type (cancer 1)</b>                                                                                                                                    | <br> <input type="text"/>                                                                                                 |
| <b>Tumor marker (1) result interpretation (cancer 1)</b>                                                                                                                         | <br> <input type="text"/>                                                                                                 |
| <b>Tumor marker (1) result (cancer 1)</b>                                                                                                                                        | <br> <input type="text"/>                                                                                                 |
| <b>Tumor biomarker (1) result unit (cancer 1)</b>                                                                                                                                | <br> <input type="text"/>                                                                                                 |
| <b>Biomarker (1) lab name (cancer 1)</b>                                                                                                                                         | <br> <input type="text"/>                                                                                                 |
| <b>Is there another biomarker?</b>                                                                                                                                               | <br> <input type="radio"/> Yes <input type="radio"/> No <a href="#">reset</a>                                             |
| <b>Comments (cancer 1)</b>                                                                                                                                                       | <br> <div><div></div><div>Expand</div></div>                                                                              |
| <b>Does patient have second cancer? (2)</b>                                                                                                                                      | <br> <input type="radio"/> Yes <input type="radio"/> No <a href="#">reset</a>                                            |
| <b>Form Status</b>                                                                                                                                                               |                                                                                                                                                                                                                                                                                             |
| <b>Complete?</b>                                                                                                                                                                 | <br> <input type="text" value="Incomplete"/>                                                                          |
| <b>Lock this instrument?</b><br>If locked, no user will be able to modify this instrument for this record until someone with Instrument Level Lock/Unlock privileges unlocks it. |                                                                                                                                                                                                                                                                                             |
| <input type="checkbox"/>  <b>Lock</b>                                                         |                                                                                                                                                                                                                                                                                             |
| <a href="#">Save &amp; Exit Form</a>                                                                                                                                             |                                                                                                                                                                                                                                                                                             |
